# Supplementary material
Source: publisher figshare collection journal article supplement (https://acs.figshare.com/ndownloader/files/5825277)
Supplement: Supplementary file 1 [file 5825277]

# Fabrication of sub-50 nm Solid-State Nanostructures Based on Dip-Pen Nanolithography

*Hua Zhang, Sung-Wook Chung, and Chad A. Mirkin\**

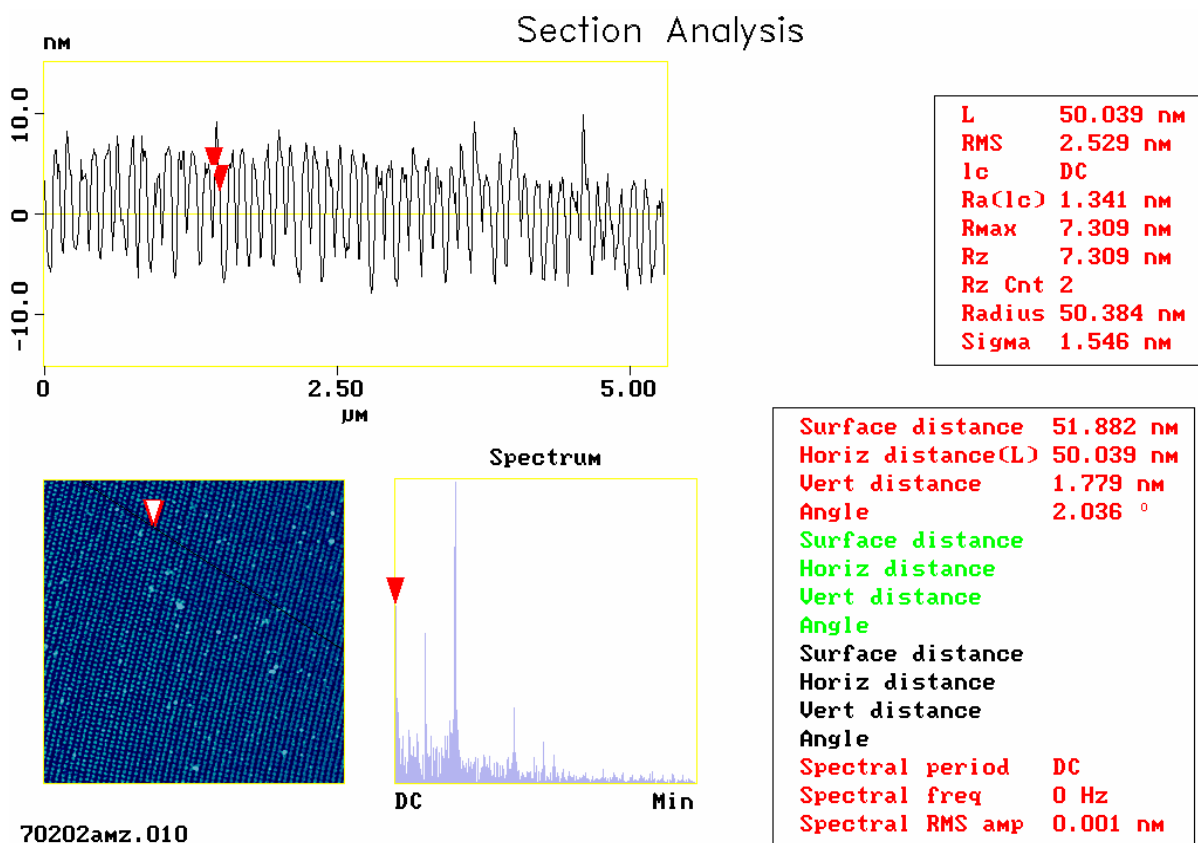

**Figure S1A.** Section Analysis of the etched Au nanoarrays in Figure 1A.

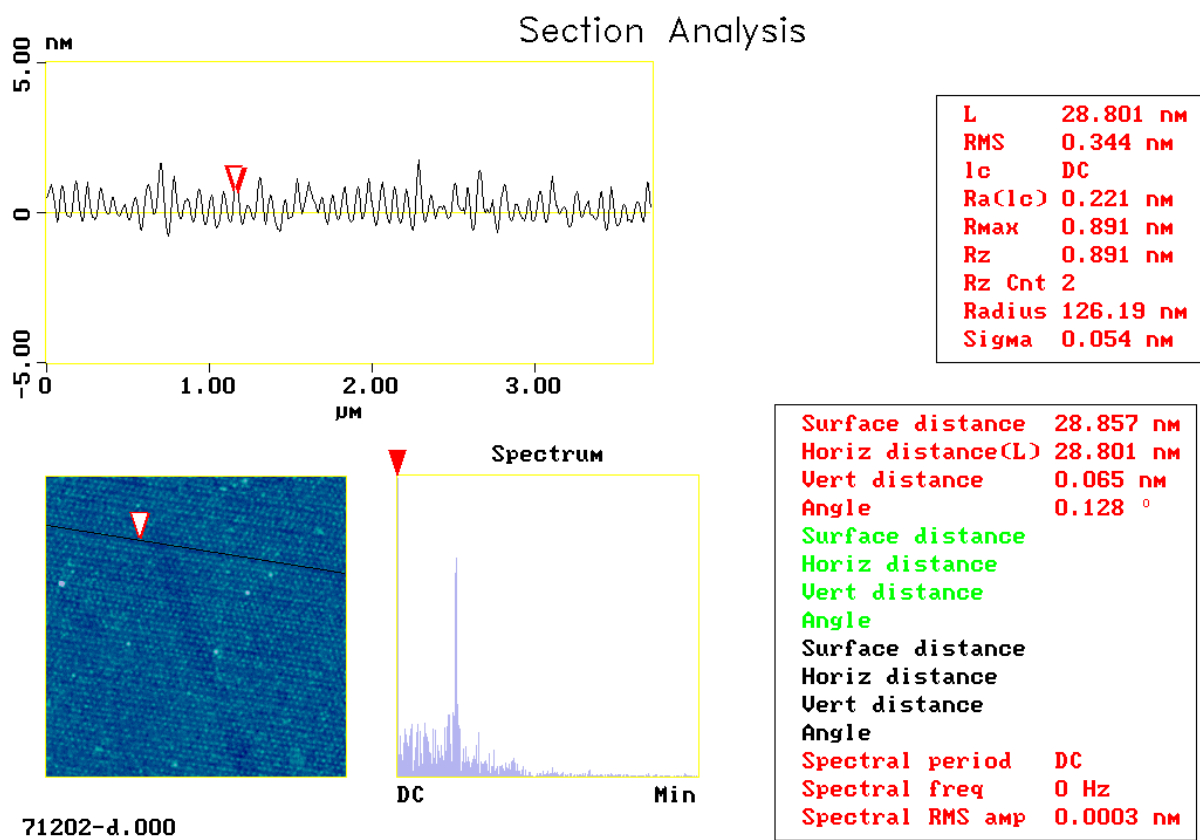

**Figure S1B.** Section Analysis of the etched Au nanoarrays in Figure 1C. The average diameter of the etched Au dots is  $25 \pm 5$  nm.

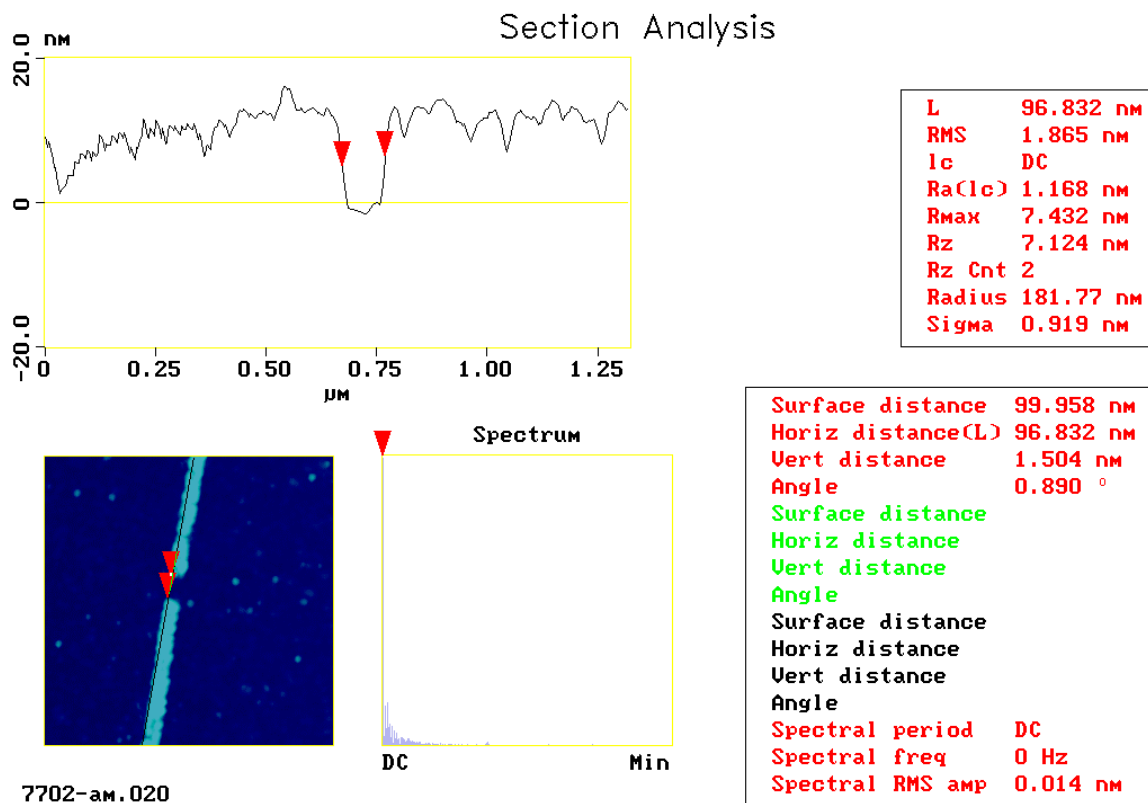

**Figure S2A.** Section Analysis of the etched Au nanogap in Figure 2A.

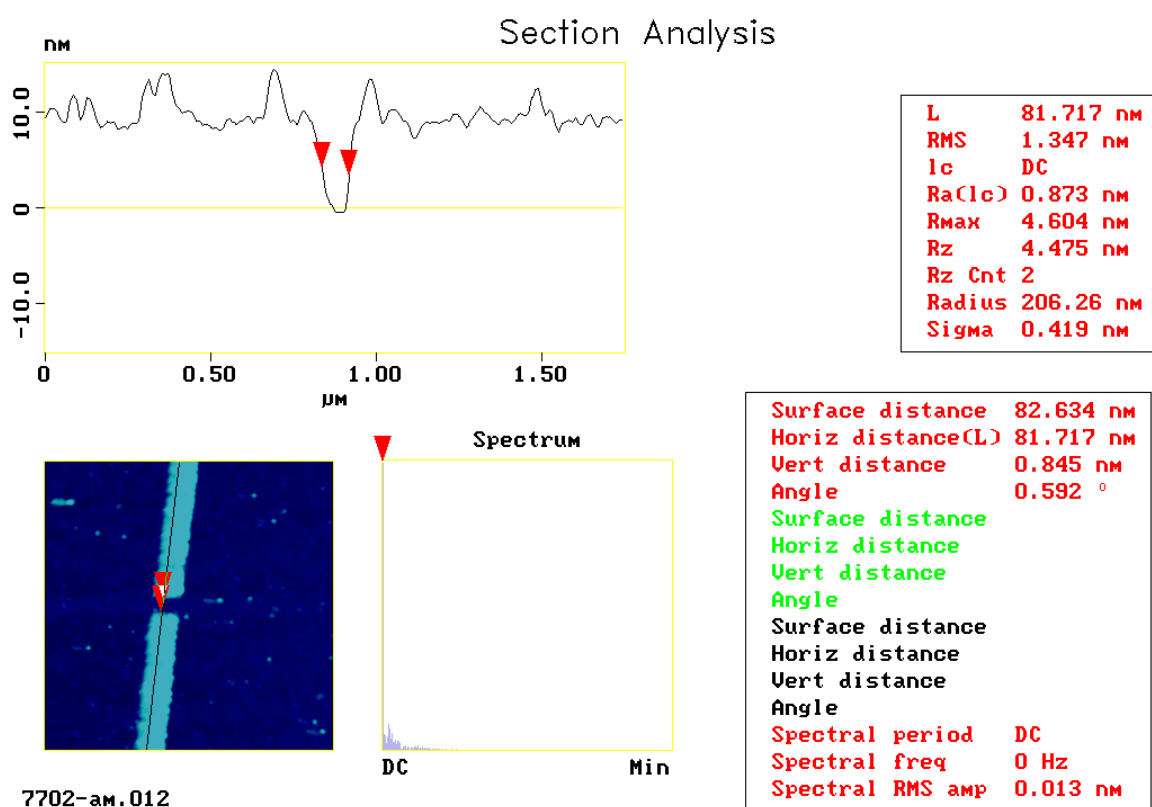

**Figure S2B.** Section Analysis of the etched Au nanogap in Figure 2B.

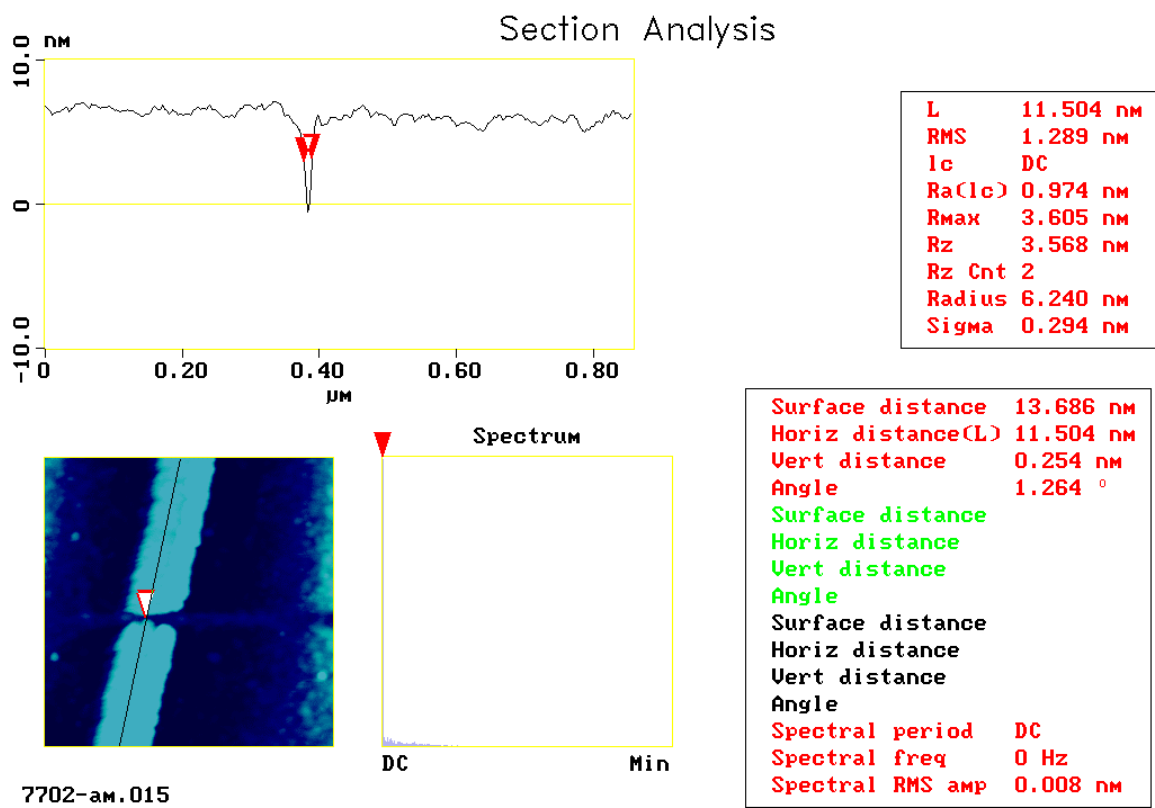

**Figure S2C.** Section Analysis of the etched Au nanogap in Figure 2C.
